# Supplementary material
Source: publisher figshare collection journal article supplement (https://geolsoc.figshare.com/ndownloader/files/22475891)
Supplement: Supplementary file 1 [file 22475891]

## Sheet: Sheet1
	AT3					AT4						AT9						AT29		AT32		AT37
SiO2	29.905	29.645	30.202	29.942		30.39	30.963	30.953	30.84	30.888		29.731	29.981	30.087	29.955	29.423		29.604		29.347		30.062
TiO2	33.585	35.283	33.804	36.881		36.841	35.073	31.272	34.182	31.422		36.405	34.444	35.514	35.106	34.243		34.91		38.739		37.288
Al2O3	3.416	1.474	2.996	1.204		0.907	2.192	4.695	2.946	4.36		1.801	2.777	2.149	1.655	1.349		2.691		0.679		0.915
Cr2O3	0.026	0.04	0.009	0.002		0	0.063	0.007	0.056	0		0.063	0	0.107	0	0.026		0.198		0.194		0.103
FeO	0.344	1.273	0.224	0.27		0.16	0.479	0.432	0.72	0.466		0.305	0.539	0.331	0.57	0.291		0.128		0.158		0.337
MnO	0.044	0.046	0.037	0.108		0.029	0.084	0.001	0.06	0.046		0.07	0.074	0.071	0	0.077		0		0.032		0.016
MgO	0.002	0.501	0.015	0		0	0.001	0.009	0.017	0		0.003	0.04	0.018	0	0		0.007		0.019		0
CaO	28.948	28.05	29.985	31.515		29.439	28.102	29.544	29.777	29.788		29.252	30.609	30.288	29.546	30.838		31.5		28.662		31.198
Na2O	0	0.029	0.019	0.02		0	0.004	0	0.032	0		0	0	0	0.01	0.032		0.01		0.018		0
K2O	0.005	0.025	0.007	0		0	0	0.003	0	0.004		0	0.009	0.007	0	0		0		0		0
P2O5	0	0	0	0.024		0	0.01	0	0.015	0		0	0	0	0	0		0		0		0
F	0.524	0.045	0.45	0.183		0	0.196	0.223	0.285	0.565		0.061	0.015	0.03	0	0		0.015		0.03		0
Cl	0	0.008	0.001	0		0	0.001	0.003	0	0.005		0	0	0	0.003	0		0.005		0		0
SO3	0.006	0.016	0	0.017		0	0.011	0	0	0.006		0.028	0.009	0.009	0	0.005		0		0.001		0
Total	96.623	96.426	97.985	100.254		97.773	97.096	97.088	98.835	97.311		97.867	98.795	98.683	96.848	96.327		99.199		98.014		100.117
